# Supplementary material for: Establishment of single-cell screening system for the rapid identification of transcriptional modulators involved in direct cell reprogramming
Source: PubMed Central journal article supplement — Nucleic Acids Res. 2012 Aug 8;40(21):e165. doi: 10.1093/nar/gks732 (PMC3505982; doi:10.1093/nar/gks732), 2012-08-08
Supplement: supp_gks732_nar-00964-met-k-2012-File006.pdf [file supp_gks732_nar-00964-met-k-2012-File006.pdf]

## Supplementary information

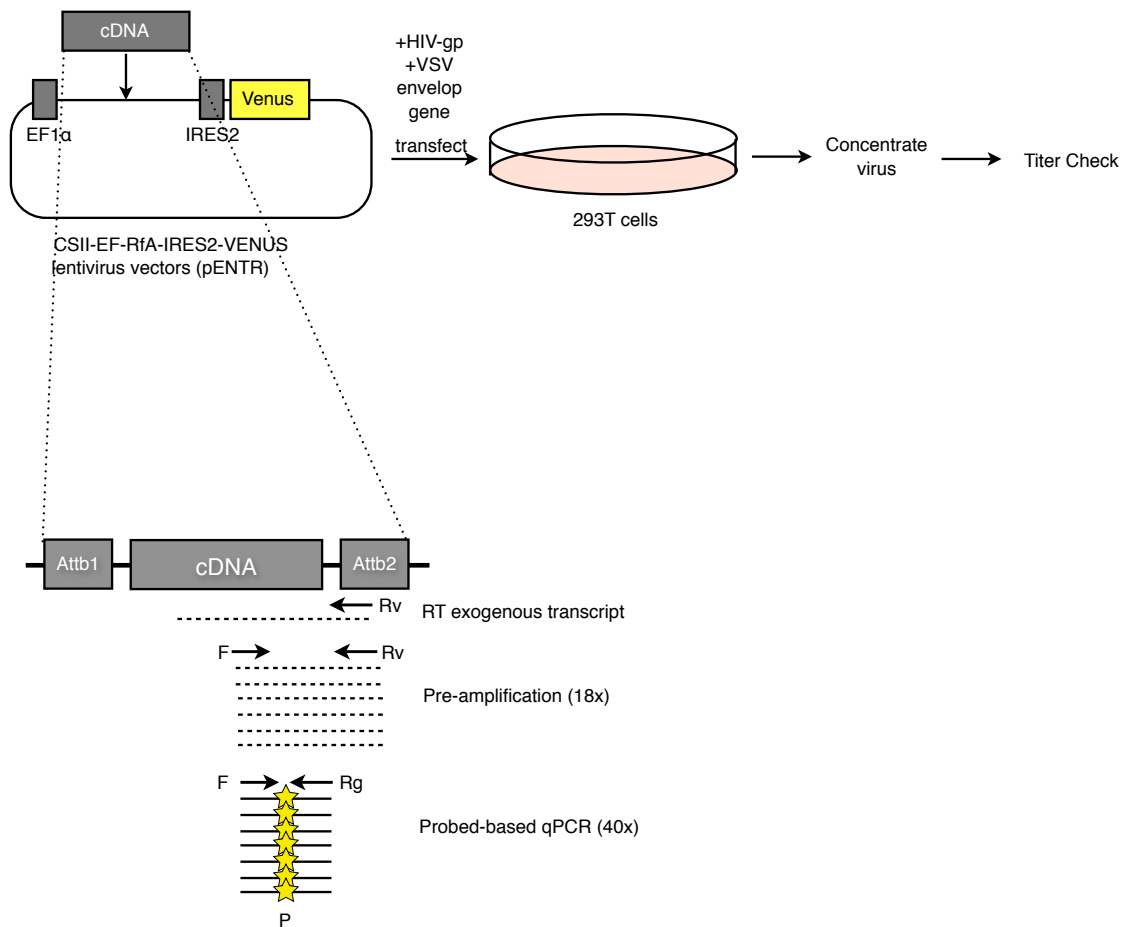

**Supplementary Figure 1. Virus preparation and detection of virus-specific transcripts.** (A) Full-length cDNA of monocyte-associated transcription factors were cloned into pENTR lentivirus vector and transfected to 293T cells in conjunction with HIV-gp and VSV envelop gene plasmids. Collecting the supernatant for a period of two days, the virus was first concentrated and the titer was calculated. (B) Using the Entry Clone specific-Attb2 sequence in all of the exogenous transcripts, we designed a reverse-primer (Rv) to synthesize cDNA for exogenous-specific transcripts. Then, using gene-specific forward (sense) primers (F), we pre-amplified the exogenous cDNA for 18 PCR cycles. Subsequently, the pre-amplified cDNA was dilute and loaded onto microfluidic single-cell qPCR platform using the gene-specific forward (sense) primer (F) and the gene-specific reverse (antisense) primer (Rg) in conjunction with the gene gene fluorescent probe (P) for specificity.



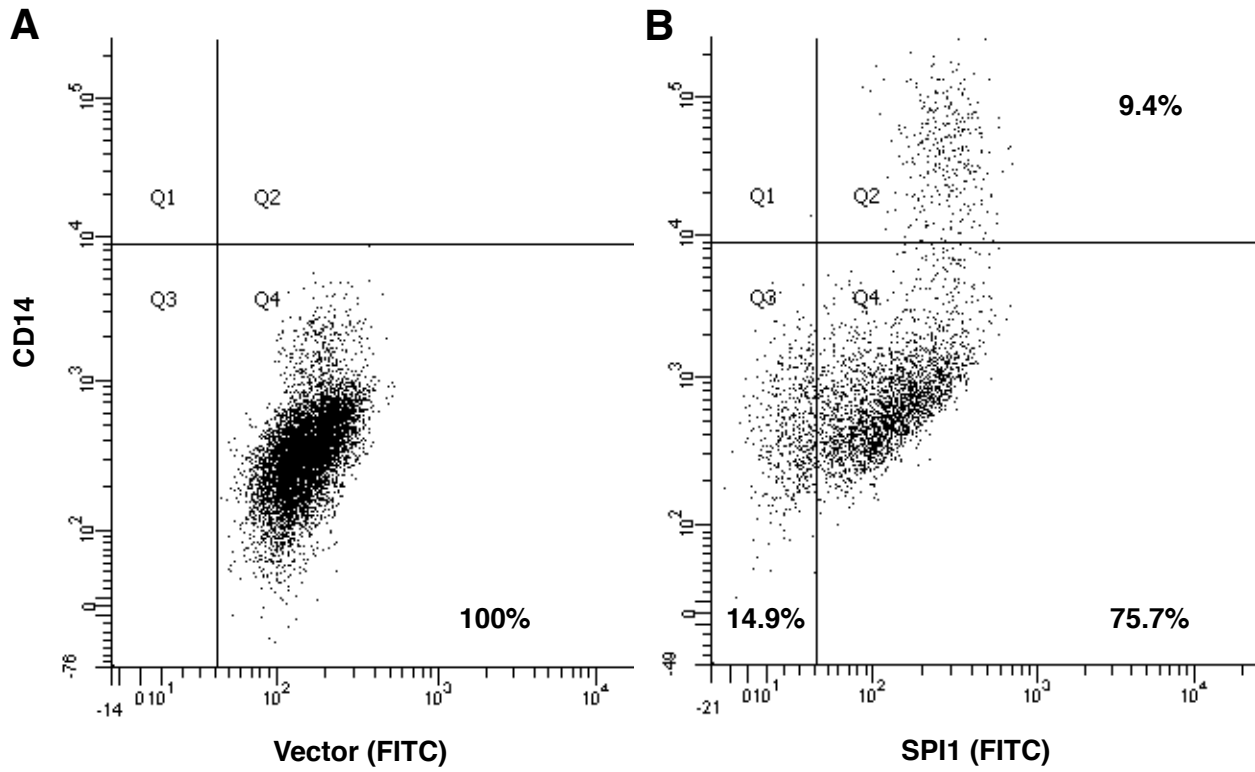

**Supplementary Figure 3. Detection of CD14 positive cells after ectopic expression of single SPI1 gene in dermal fibroblasts.** Human dermal fibroblasts were infected with either vector control (A) or SPI1 (B) expressing Venus. Two weeks post transduction, 9.4% cells of the total cell population or 12% of SPI1+ cells expressed the CD14 cell-surface marker. Fibroblasts transduced with vector control had no CD14 expression.

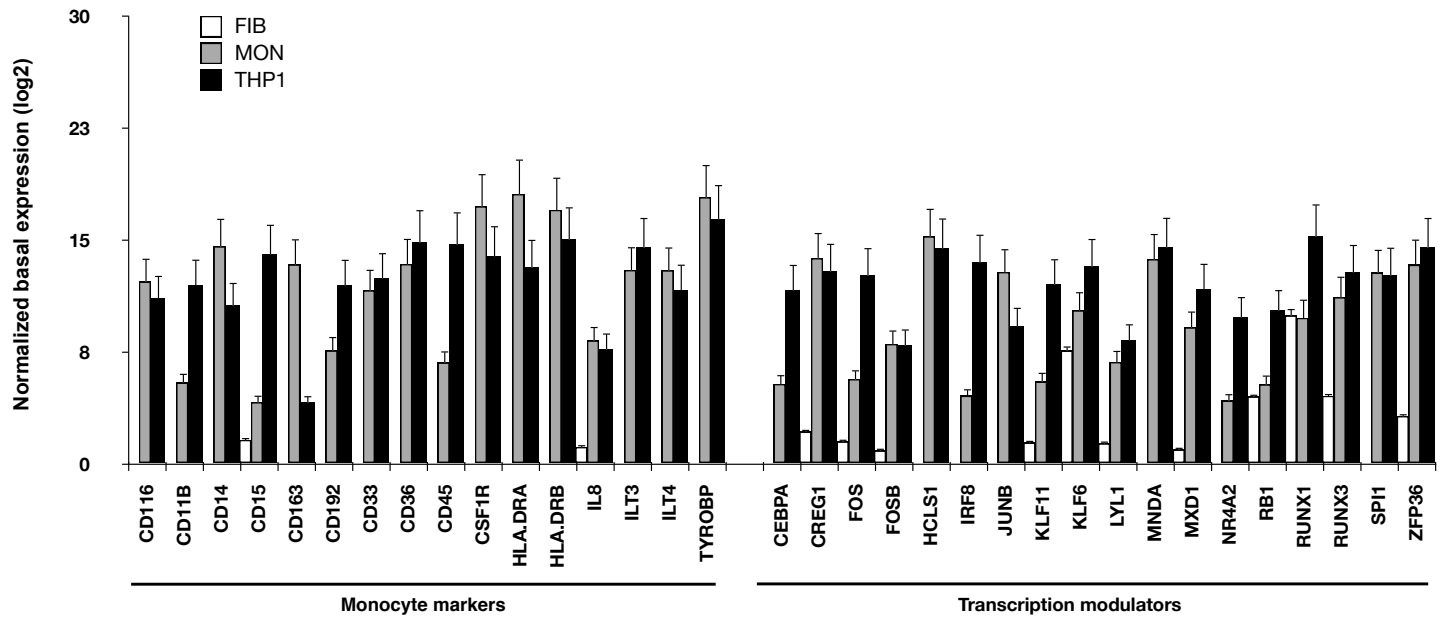

**Supplementary Figure 4. Basal expression of monocyte markers and transcription modulators.** Total RNA from human dermal fibroblasts, primary monocytes and THP1 cells were isolated and subjected to a standard qRT-PCR gene expression analysis. The gene expression values (Ct) were normalized based on the ACTB expression and then inverted by subtracting 35 to all samples. The error bars represent standard deviation.

**A**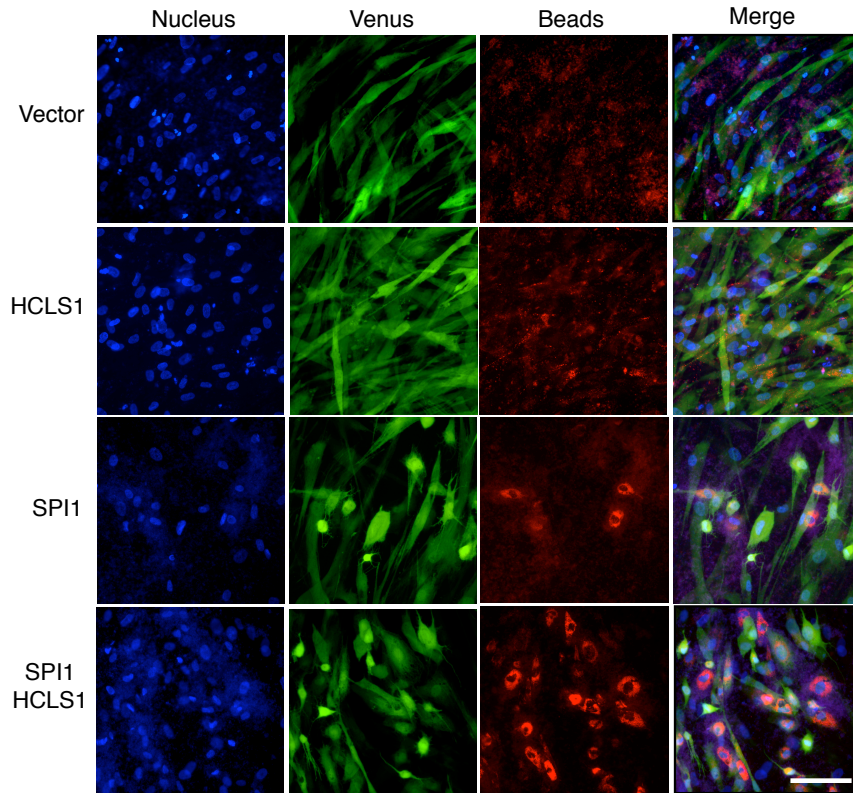**B**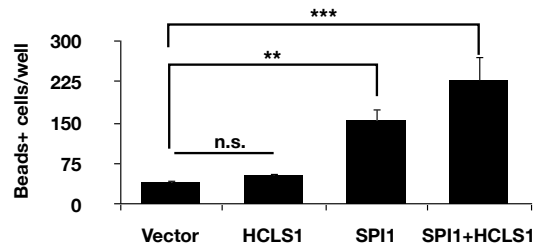

**Supplementary Figure 5. SPI1 and HCLS1 synergistically induce phagocytosis activity in fibroblasts.** (A) pHrodo™ Red E. coli BioParticles® conjugate beads which is pH-sensitive Rhodamine dye specifically express in phagosomes were added onto fibroblasts transduced with either SPI1, HCLS1 or both (Venus; green). Cells positive for Rhodamine (red) were clearly visible in both SPI1 and SPI1/HCLS1-pair, however, no detection was found in cells transduced only with HCLS1. (B) Using the computer-assisted image analysis, we quantified the number of cells (Hoechst, blue) and Rhodamine bead+ positive cells. The SPI1 and HCLS1 combination significantly enhanced the phagocytotic activity as compared to control and SPI1 alone. Ten images were taken per each well and 6 well replicates were performed for each assay. Scale bar = 100µm.

**Supplementary Table 1.****List of entry clones used to construct lentivirus**

|    | <b>Gene</b> | <b>Ref Seq.</b> | <b>Entry clone ID</b> | <b>Source</b>  |
|----|-------------|-----------------|-----------------------|----------------|
| 1  | CEBPA       | NM_004364.3     | W01F001A23            | RIKEN          |
| 2  | CREG1       | NM_003851.2     | OHS4559-99857135      | OpenBioSystems |
| 3  | FOS         | NM_005252.2     | W01A062B19            | RIKEN          |
| 4  | FOSB        | NM_006732.2     | W01B007E09            | RIKEN          |
| 5  | HCLS1       | NM_005335.4     | OHS4559-99858986      | OpenBioSystems |
| 6  | IRF8        | NM_002163.2     | W01B007E15            | RIKEN          |
| 7  | JUNB        | NM_002229.2     | W01A003N09            | RIKEN          |
| 8  | KLF11       | NM_003597.4     | W01A126A07            | RIKEN          |
| 9  | KLF6        | NM_001300.5     | W01A125A03            | RIKEN          |
| 10 | LYL1        | NM_005583.3     | W01A002L03            | RIKEN          |
| 11 | MNDA        | NM_002432.1     | W01A004O18            | RIKEN          |
| 12 | MXD1        | NM_002357.2     | IOH40302              | Invitrogen     |
| 13 | NR4A2       | NM_173173.1     | W01A006J20            | RIKEN          |
| 14 | RB1         | NM_000321.2     | OHS4559-99857768      | OpenBioSystems |
| 15 | RUNX1       | NM_001001890.2  | W01F001A03            | RIKEN          |
| 16 | RUNX3       | NM_001031680.2  | W01A044B11            | RIKEN          |
| 17 | SPI1        | NM_001080547.1  | W01F001A07            | RIKEN          |
| 18 | ZFP36       | NM_003407.2     | W01A003I20            | RIKEN          |

Supplementary Table 2

List of primer sequences for preamplification and qPCR

|    | Primer         | Forward (5'→3')         | Reverse (5'→3')           | UPL_Probe# | Comment                             |
|----|----------------|-------------------------|---------------------------|------------|-------------------------------------|
| 1  | CEBPA          | tggacaagaacagcaacgag    | gcggctcattgtcactggtc      | #67        | Monocyte factors                    |
| 2  | CREG1          | agctctccgtgagcaacc      | tgtgccaaagtcatggtcag      | #2         | Monocyte factors                    |
| 3  | FOS            | ctggcgttftgaagacat      | ttcccttcggattctcttt       | #51        | Monocyte factors                    |
| 4  | FOSB           | ctgaccgaccgactccag      | gcacaaactccagacgttcc      | #78        | Monocyte factors                    |
| 5  | HCLS1          | cgagggtggagaagcactctt   | atcaaagccgactcctgact      | #89        | Monocyte factors                    |
| 6  | IRF8           | gagggtggccaggcttctg     | cggccctggctgttatag        | #20        | Monocyte factors                    |
| 7  | JUNB           | caaggtgaagacgctcaagg    | tcatgaccttctgtttgagctg    | #32        | Monocyte factors                    |
| 8  | KLF11          | cccatcttcgcaactcacac    | cgagcaaaactttttacacagc    | #7         | Monocyte factors                    |
| 9  | KLF6           | gatgagttaaccaggcacttcc  | agagggtcctctcatgtgc       | #85        | Monocyte factors                    |
| 10 | LYL1           | ccactgtgagctggacctg     | aggcgcctgtaaacgttct       | #45        | Monocyte factors                    |
| 11 | MNDA           | tggcacaatatacaagtgtgaga | tttctggccttgatgacct       | #29        | Monocyte factors                    |
| 12 | MXD1           | gagcagcgacacctgaaga     | ccagctcaacgtcgaattc       | #78        | Monocyte factors                    |
| 13 | RB1            | tcttgaggaggaccagag      | aggttctctgtttctcaaaactca  | #34        | Monocyte factors                    |
| 14 | RUNX1          | ctccctgaaccactccactg    | tgggatggttgatctg          | #30        | Monocyte factors                    |
| 15 | RUNX3          | ggctcactcagcaccaca      | atgggttcagttccgaggt       | #66        | Monocyte factors                    |
| 16 | SPI1           | ccactggagggtgtctgacg    | ctgtgacaggcggacttct       | #1         | Monocyte factors                    |
| 17 | ZFP36          | gtcctccagctccttctcg     | gagggtgacagtggaaggtc      | #24        | Monocyte factors                    |
| 18 | NR4A2          | tctccaacttcagaatataga   | ccactcttgggttctctg        | #37        | Monocyte factors                    |
| 19 | CD11B (ITGAM)  | ggeatcgcgaaagtgtga      | ggacttaaaaggcattctttg     | #9         | Marker                              |
| 20 | CD14           | gttcggaagacttatcgacct   | acaaggctctggcgtggt        | #74        | Marker                              |
| 21 | CD15           | cgtaggacacttcccaag      | gttcggctcagggaaaag        | #52        | Marker                              |
| 22 | CD163          | ggcagtgcccatcatctc      | tcttctgaagtcttatctgttg    | #7         | Marker                              |
| 23 | CD33           | caggaatgacaccacccta     | tcagtgggcccattgtaactt     | #75        | Marker                              |
| 24 | CD36           | gtgcttattcttggcttaataga | ttacttgacttctgaacatgtttgc | #9         | Marker                              |
| 25 | CD45 (PTPRC)   | ccaatgcaaaactcaacccta   | cctctctctgggacatctg       | #27        | Marker                              |
| 26 | CD115 (CSF1R ) | tctgtcctatggcatcctc     | gatgccagggtgaggattc       | #14        | Marker                              |
| 27 | CD116 (GMCSFR) | accatgaggtggaagacgag    | aagacctcttcgcggtagc       | #6         | Marker                              |
| 28 | CD192 (CCR2)   | tgagacaagccacaagctga    | ttctgataaaccgagaacgagat   | #56        | Marker                              |
| 29 | HLA-DRA        | gccctcaactgaggacgtt     | gcataaaactcccagtgctt      | #45        | Marker                              |
| 30 | HLA-DRB        | ccgggctgttcatctactc     | ccttgaatgtgtcactctgc      | #41        | Marker                              |
| 31 | TYROBP         | gagaccgagtcgcttatca     | ctgtgtgtgaggtcgtgt        | #1         | Marker                              |
| 32 | IL8            | agacagcagagcacacaagc    | atggttcttccgggtgt         | #72        | Marker                              |
| 33 | ILT3           | gagccagagcccaaggac      | ttcacggcagcacagaagt       | #26        | Marker                              |
| 34 | ILT4           | tgaaggacacacagcctgaa    | agctggcgtaggtcacat        | #66        | Marker                              |
| 35 | ACTB           | ccaaccgcgagaagatga      | ccagagcgtacagggatag       | #64        | House keeping                       |
| 36 | attB2          |                         | ACCACTTTGTACAAGAAAGCTGGG  |            | For preamplification Reverse primer |
